# Supplementary material for: Factors affecting completion of the SF-36 in older people
Source: Oxford University Press journal article supplement (doi:10.1093/ageing/afl003), 2006-04-25
Supplement: afl003_Supplementary_Data.zip [file afl003_Supplementary_Data.zip]

Archive with 1 entries (1 files):
- afl003_Appendix_1.pdf
