# Supplementary material for: Factors affecting completion of the SF-36 in older people
Source: Oxford University Press journal article supplement (doi:10.1093/ageing/afl003), 2006-04-25
Supplement: afl003_Supplementary_Data.zip [file afl003_Supplementary_Data.zip › afl003_Appendix_1.pdf]

## **Appendix 1**

### ***Definitions of SF-36 completion***

Completion of individual items: a recordable answer was given to an individual question of the SF-36 schedule.

Completion of an individual dimension: sufficient questions were completed within a single dimension to calculate a score for that dimension.

Completion of a valid SF-36: sufficient question were completed to enable calculation of a score for all dimensions.

Self or interview completion: was recorded as either *self completion*, where the subject required no help from the interviewer to start and finish completion of the SF-36 questionnaire; *part self completion* where the patient was able to complete part of the questionnaire but required help to finish the process and *interview completion*, where the patient was unable to attempt or successfully attempt any item on the questionnaire without help from the interviewer.

### ***Missing data***

Physical and functional assessments provided complete data for cognitive impairment and hearing impairment, relatively complete data for functional impairment (17 missing values), visual impairment (10 missing) and dysphasia (6 missing). Assessment of mood disorder (49 missing) and visuospatial dysfunction (57 missing) proved more difficult to obtain from some subjects. For the analysis, missing values on impairments were re-coded so that each impairment was a binary variable denoting impairment/no impairment or missing.

### ***Inter-observer agreement***

To determine inter-rater reliability, after a period of familiarisation and training, 10 interviews were conducted jointly between the interviewers, with one interviewer conducting and scoring the interview and one observer observing and scoring the interview. Levels of agreement between the two observers were moderate to good for the six questions on the SF-36 which require the user to provide a single response (Kappa values ranged from 0.53 - Question 1, to 0.79 - Question 7). Moderate to very good levels of agreement were also observed on arguably the most subjective of the assessments - the whisper test (Kappa values from 0.45 to 0.80).
